# Supplementary material for: Genomic insights into Dactylosporangium sp. AC04546, a rubber degrader with three latex clearing proteins
Source: PubMed Central journal article supplement (PMC11169899; doi:10.3389/fmicb.2024.1378082), 2024-05-30
Supplement: Presentation_1.pdf [file Presentation_1.pdf]

## Supplementary Figures & Tables

Supplementary Table 1. Estimates of evolutionary divergence between lcp sequences in this study and Lcp sequences that their Lcps has been characterized.

|                                                      | 1   | 2   | 3   | 4   | 5   | 6   | 7   | 8   | 9   | 10  | 11  | 12  | 13  | 14  | 15  | 16  | 17  | 18  | 19 |
|------------------------------------------------------|-----|-----|-----|-----|-----|-----|-----|-----|-----|-----|-----|-----|-----|-----|-----|-----|-----|-----|----|
| 1 <i>Streptomyces</i> AC04842_lcp_1                  |     |     |     |     |     |     |     |     |     |     |     |     |     |     |     |     |     |     |    |
| 2 <i>Streptomyces</i> AC04842_lcp_2                  | 76% |     |     |     |     |     |     |     |     |     |     |     |     |     |     |     |     |     |    |
| 3 <i>Microtetraspora</i> AC03309_lcp_1               | 78% | 49% |     |     |     |     |     |     |     |     |     |     |     |     |     |     |     |     |    |
| 4 <i>Microtetraspora</i> AC03309_lcp_2               | 84% | 56% | 53% |     |     |     |     |     |     |     |     |     |     |     |     |     |     |     |    |
| 5 <i>Dactylosporangium</i> AC04546_lcp_1             | 29% | 77% | 79% | 80% |     |     |     |     |     |     |     |     |     |     |     |     |     |     |    |
| 6 <i>Dactylosporangium</i> AC04546_lcp_2             | 69% | 50% | 45% | 26% | 68% |     |     |     |     |     |     |     |     |     |     |     |     |     |    |
| 7 <i>Dactylosporangium</i> AC04546_lcp_3             | 76% | 51% | 17% | 55% | 75% | 50% |     |     |     |     |     |     |     |     |     |     |     |     |    |
| 8 AAR25849_ <i>Streptomyces</i> _sp._K30             | 75% | 37% | 54% | 57% | 72% | 51% | 50% |     |     |     |     |     |     |     |     |     |     |     |    |
| 9 BBH69278_ <i>Actinoplanes</i> _sp._OR16            | 70% | 53% | 51% | 30% | 64% | 19% | 54% | 57% |     |     |     |     |     |     |     |     |     |     |    |
| 10 BBH69279_ <i>Actinoplanes</i> _sp._OR16           | 75% | 53% | 26% | 65% | 76% | 59% | 22% | 56% | 61% |     |     |     |     |     |     |     |     |     |    |
| 11 BBH70267_ <i>Actinoplanes</i> _sp._OR16           | 46% | 77% | 73% | 81% | 42% | 67% | 73% | 74% | 68% | 73% |     |     |     |     |     |     |     |     |    |
| 12 ABV68923_ <i>Gordonia</i> _polyisoprenivorans_VH2 | 83% | 64% | 64% | 43% | 84% | 39% | 64% | 64% | 42% | 66% | 82% |     |     |     |     |     |     |     |    |
| 13 ABV68924_ <i>Gordonia</i> _westfalica             | 86% | 59% | 65% | 46% | 87% | 42% | 65% | 63% | 45% | 68% | 85% | 25% |     |     |     |     |     |     |    |
| 14 WP025350295_ <i>Nocardia</i> _nova                | 84% | 65% | 69% | 51% | 86% | 46% | 67% | 64% | 50% | 71% | 85% | 44% | 44% |     |     |     |     |     |    |
| 15 AMY60409_ <i>Rhodococcus</i> _rhodochrous         | 82% | 56% | 57% | 36% | 76% | 33% | 55% | 56% | 31% | 61% | 78% | 38% | 42% | 46% |     |     |     |     |    |
| 16 API85527_ <i>Nocardia</i> _sp._strain_NVL3        | 81% | 62% | 64% | 40% | 80% | 36% | 63% | 60% | 39% | 71% | 87% | 44% | 41% | 41% | 41% |     |     |     |    |
| 17 ABC59140_ <i>Nocardia</i> _farcinica              | 80% | 60% | 59% | 40% | 76% | 33% | 58% | 61% | 36% | 67% | 79% | 42% | 45% | 44% | 41% | 29% |     |     |    |
| 18 BDB59083_ <i>Rhodococcus</i> _sp._RDE2            | 82% | 56% | 57% | 36% | 76% | 33% | 55% | 56% | 31% | 61% | 78% | 38% | 42% | 46% | 0%  | 41% | 41% |     |    |
| 19 WP104231946_ <i>Solimonas</i> _fluminis           | 85% | 72% | 67% | 59% | 77% | 49% | 67% | 64% | 53% | 69% | 81% | 56% | 58% | 63% | 54% | 65% | 60% | 54% |    |

The number of amino acid substitutions per site from between sequences is shown. Analyses were conducted using the Poisson correction model. This analysis involved 19 amino acid sequences. All ambiguous positions were removed for each sequence pair (pairwise deletion option). There was a total of 485 positions in the final dataset. Evolutionary analyses were conducted in MEGA11 (Tamura et al. 2021).

Supplementary Table 2. Pairwise sequence alignment (PSA) of strain AC04546 and Actinoplanes sp. strain OR16 latex clearing protein (lcp) amino acid sequences.

|                         | Strain AC04546 lcp1 |          |              |                | Strain AC04546 lcp2 |          |              |                | Strain AC04546 lcp3 |          |              |                |
|-------------------------|---------------------|----------|--------------|----------------|---------------------|----------|--------------|----------------|---------------------|----------|--------------|----------------|
|                         | Length (bp)         | Gaps (%) | Identity (%) | Similarity (%) | Length (bp)         | Gaps (%) | Identity (%) | Similarity (%) | Length (bp)         | Gaps (%) | Identity (%) | Similarity (%) |
| <b>Strain OR16 lcp1</b> | 422                 | 9.2      | 50.0         | 64.7           | 407                 | 3.2      | 80.1         | 87.7           | 408                 | 4.4      | 56.6         | 73.0           |
| <b>Strain OR16 lcp2</b> | 417                 | 9.4      | 44.1         | 58.5           | 408                 | 6.1      | 52.9         | 68.9           | 403                 | 4.5      | 76.4         | 84.1           |
| <b>Strain OR16 lcp3</b> | 422                 | 8.1      | 62.6         | 75.1           | 412                 | 4.4      | 50.2         | 66.3           | 411                 | 4.6      | 47.2         | 62.0           |

Note: Highlighted cells show the highest similarity among the 3 lcp amino acid sequences.



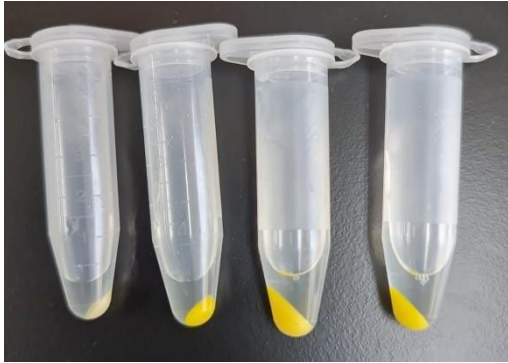

Supplementary Figure 2. The cells of *E. coli* Rosetta-gami B(DE3)pLysS with (i) empty vector and (ii) Lcp1 (iii) Lcp2 and (iv) Lcp3 expression vectors (left to right).

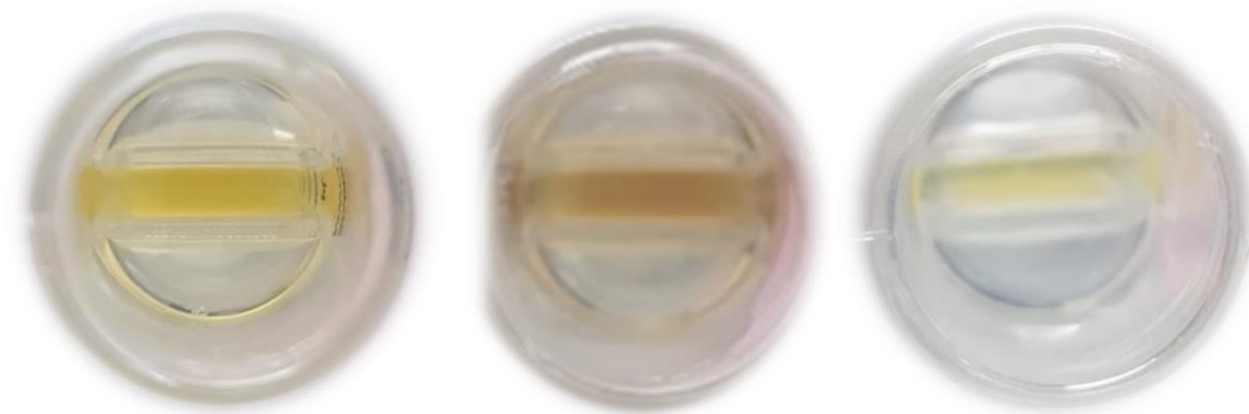

Supplementary Figure 3. Concentrated supernatant using 30 kDa filtration (left to right): Lcp1 dark yellow (14 mg/mL), Lcp2 brownish (17 mg/mL) and Lcp3 light yellow (8 mg/ mL).

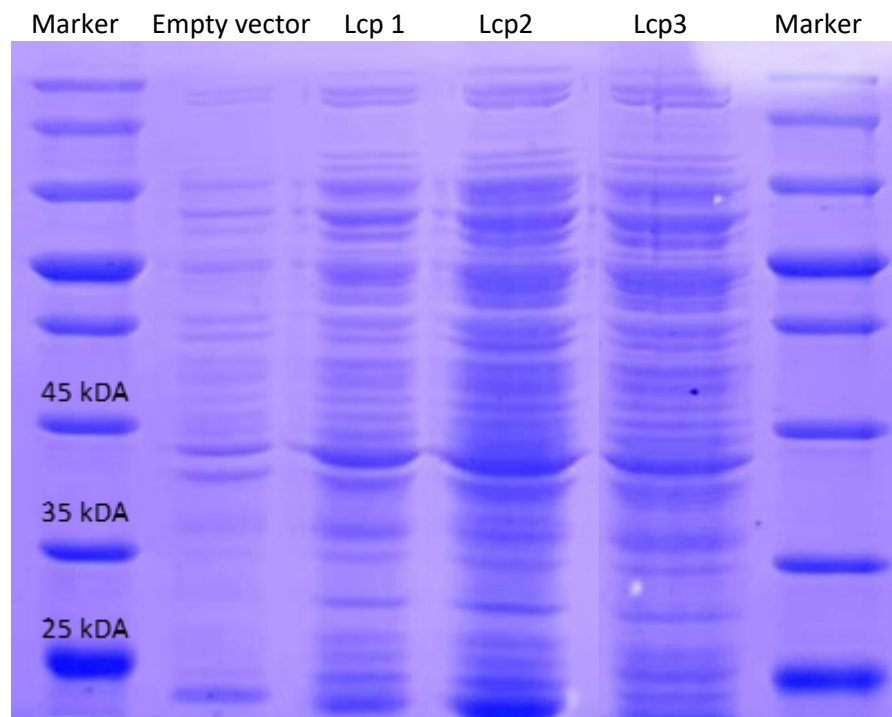

Supplementary Figure 4. SDS-PAGE of 10 mg crude Lcp-his extract, Lcp is predicted at approximately 45 kDa.

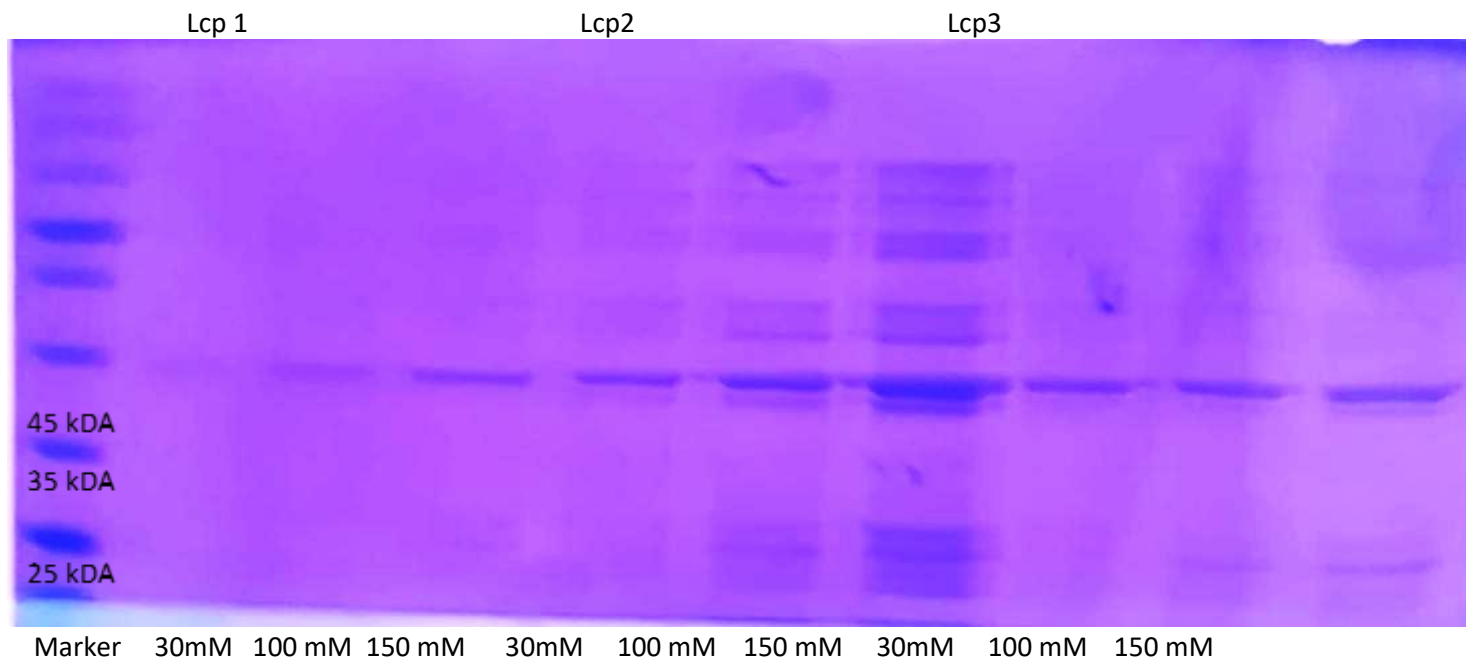

Supplementary Figure 5. SDS-PAGE of purified Lcp (20 mL loaded) for pcold IV using TALON spin column with different concentration of imidazole.
